# Supplementary material for: Genetically engineered IgG1 and nanobody oligomers acquire strong intrinsic CD40 agonism
Source: PubMed Central journal article supplement (PMC10793706; doi:10.1080/21655979.2024.2302246), 2024-01-12
Supplement: KBIE_A_2302246_SM9904.pdf [file KBIE_A_2302246_SM9904.pdf]

## Supplemental Data

### anti-CD40 antibody constructs with high intrinsic agonism

Nienke Hesen<sup>1</sup>, Mohamed Anany<sup>1</sup>, Andre Freidel<sup>1</sup>, Mediya Baker<sup>1</sup>, Daniela Siegmund<sup>1</sup>, Olena Zaitseva<sup>1</sup>, Harald Wajant<sup>1,2</sup> and Isabell Lang<sup>1</sup>

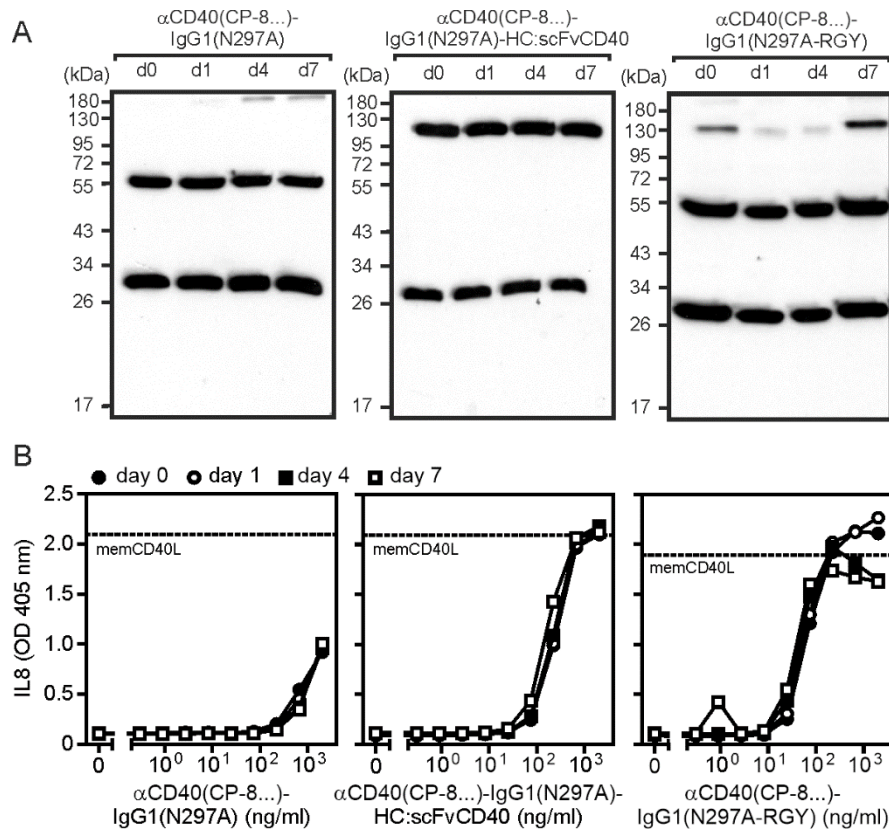

**Supplemental Figure 1. Anti-CD40(CP-8...)-IgG1(N297A)-HC:scFvCD40 and anti-CD40(CP-8...)-IgG1(N297A-RGY) are stable at 37°C.** (A,B) Anti-CD40(CP-8...)-IgG1(N297A)-HC:scFvCD40 and anti-CD40(CP-8...)-IgG1(N297A-RGY) along with their parental IgG1(N297A) variant were incubated for 1, 4 or 7 days at 37°C in medium supplemented with 2 % FCS. The samples were then analyzed by western blotting with anti-Flag mAb M2 (A) for integrity (A) and for agonistic activity by evaluation of IL8 induction in HT1080-CD40 cells (B). In the latter case, IL8 production of 1:1 cocultures with memCD40L transfected HEK293 cells served as benchmark.

**Alt text: The figure shows western blot and activity data of samples of different variants of the anti-CD40 antibody CP-870,893 which have been incubated up to 7 days at 37°C. It is evident that this treatment did not affected integrity and activity of the constructs.**

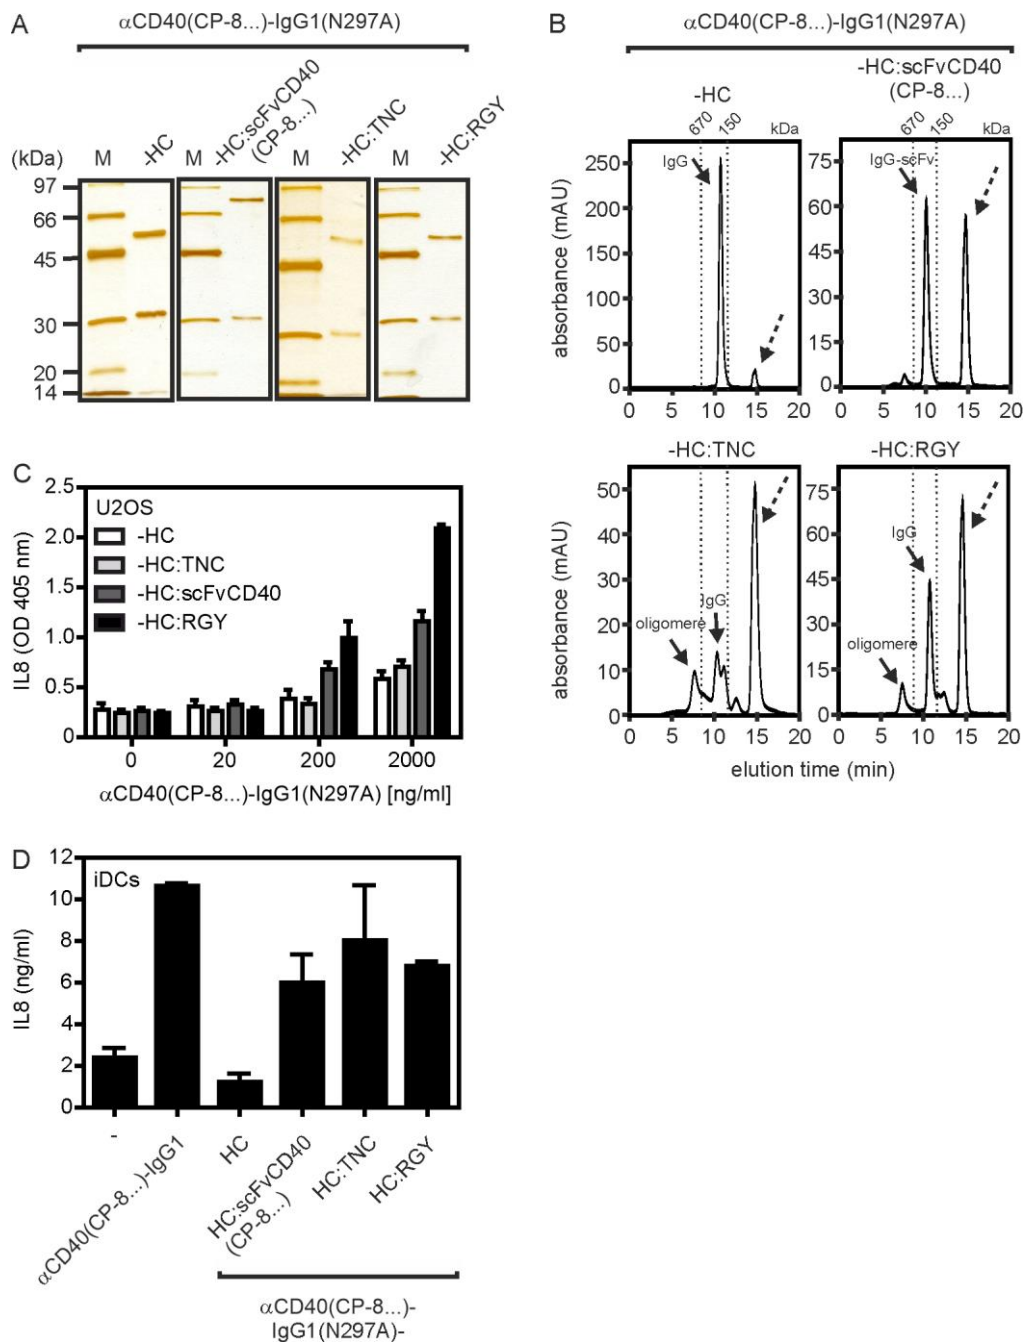

**Supplemental Figure 2. Agonism of oligovalent anti-CD40(CP-8...)-IgG1(N297A) variants and anti-CD40(CP-8...)-IgG1(N297A)-HC:scFvCD40 fusion proteins is aggregation-independent.** (A) The indicated constructs were purified by affinity chromatography on anti-Flag agarose and purity was evaluated by SDS-PAGE and silver staining. (B) Gel filtration analysis of the purified antibody fusion proteins. Dotted arrows indicate Flag peptide remained from the affinity purification. (C) IL8 induction in U2OS by purified anti-CD40(CP-8...)-IgG1(N297A) antibody variants. (D) Immature monocyte-derived dendritic cells (iDCs) were generated by cultivation of monocytes for 7 days with GM-CSF/IL4.

iDCs were then treated with 500 ng/ml of the indicated variants of anti-CD40(CP-8...). Next day, cell culture supernatants were analyzed by IL8 ELISA.

**Alt text: The figure summarizes data showing purification and gel filtration data of oligomerized versions of the anti-CD40 antibody anti-CD40(CP-8...) along with functional data. It is evident that all oligomerized constructs are highly active.**

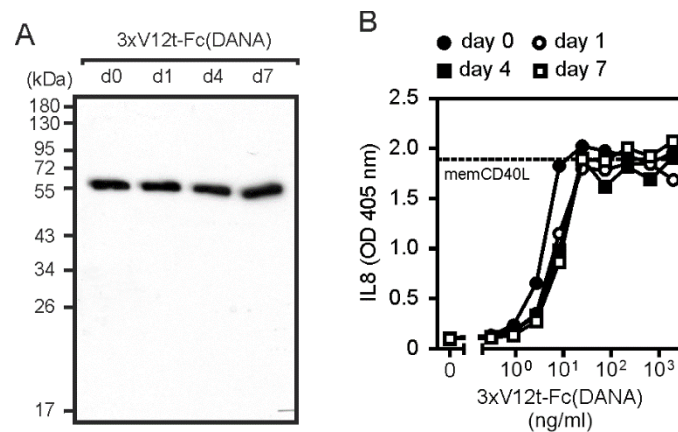

**Supplemental Figure 3. 3xV12t-Fc(DANA) is stable at 37°C.** (A,B) 3xV12t-Fc(DANA) was incubated for 1, 4 or 7 days at 37°C in medium supplemented with 2 % FCS. The samples were then analyzed by western blotting with anti-Flag mAb M2 (A) for integrity (A) and for agonistic activity by evaluation of IL8 induction in HT1080-CD40 cells (B). In the latter case, IL8 production of 1:1 cocultures with memCD40L transfected HEK293 cells served as benchmark.

**Alt text: The figure shows western blot and activity data of a nonameric fusion protein (3xV12t-TNC) of the CD40-specific nanobody V12t which has been incubated up to 7 days at 37°C. It is evident that this treatment did not affected integrity and activity of the construct.**

| construct          | peak elution time (min) | symbol |
|--------------------|-------------------------|--------|
| G28.5 (N297A-scFv) | 9.3                     | ▲      |
| Apexi (N297A-scFv) | 9.3                     | ●      |
| Seli (N297A-scFv)  | 9.4                     | ▼      |
| 3xV12t-TNC         | 11                      | ✕      |

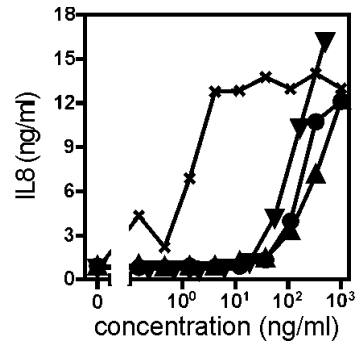

**Supplemental Figure 4. CD40-stimulating activity of the correctly assembled molecule species of the IgG1(N297A)-HC:scFv variants of G28.5, APX005M (Apexi) and CP-870,893 (Seli), and the nonameric nanobody construct 3xV12t-TNC.** The indicated proteins were initially purified by affinity chromatography using anti-Flag agarose and competitive elution with Flag peptide (100  $\mu$ g/ml) in PBS as buffer. Purified proteins were subsequently subjected to gel filtration on a MabPac SEC-1 column (#088460, Thermo Fisher). Fractions of the peaks of corresponding to the size of the correctly assembled proteins were finally assayed on HT1080-CD40 cells for their IL8-inducing capacity.

**Alt text: The figure shows IL8-induction by CD40 agonists purified by anti-Flag affinity purification and gel filtration.**

**Supplemental Table S1. pCR3-based expression plasmids and corresponding amino acid sequences.**

Leader: underlined; Flag tag: underlined + grey background; restriction site encoding 2AA linker: bold; linker: bold + italic; variable domains: italic; TNC trimerization domain: italic + underlined + grey background; IgG1(N297A), IgG1(A+RGY), Fc, Fc(DANA), FAB1(1-108): grey background.

|   |                                                             |                                                                                                                                                                                                                                                                                                                                                                                                                                                                                                                                                                                                                                                                                                                                                               |
|---|-------------------------------------------------------------|---------------------------------------------------------------------------------------------------------------------------------------------------------------------------------------------------------------------------------------------------------------------------------------------------------------------------------------------------------------------------------------------------------------------------------------------------------------------------------------------------------------------------------------------------------------------------------------------------------------------------------------------------------------------------------------------------------------------------------------------------------------|
| 1 | anti-CD40(G28.5)-Flag-VH-N297A-pCR3                         | <u>MNFGFSLIFLVLVLKGVQCEVKLVPR</u> <b>QLDYKDDDDK</b> <u>ELDIQLQQSGPGLVKPSQSLSLT</u><br>CSVTGYSITITNYNWNWIRQFPGNKLEWNGYIRYDGTSEYTPSLKNRVSI TRDTSMNQFF<br>LRLTSVTPEDTATYYCARLDYWGQGLTVTVSS <b>SGSS</b> ASTKGPSVFPLAPSSKSTSGGTA<br>ALGCLVKDYFPEPVTVSWNSGALTSVHTFPAVLQSSGLYSLSSVTVTPSSSLGTQTYI<br>CNVNHKPSNTKVDKKEPKSCDKHTHTCPPCPAPELGGPSVFLFPPKPKDTLMI SRTP<br>VTCVVVDVSHEDPEVKFNWYVDGVEVHNAKTKPREEQYASTYRVVSVLTVLHQDWLNGK<br>EYKCKVSNKALPAPIEKTISKAKGQPREPQVYTLPPSRDELTKNQVSLTCLVKGFYPSD<br>IAVEWESNGQPENNYKTPPVLDSDGSFFLYSKLTVDKSRWQQGNVFCSCVMHEALHNNH<br>YTQKSLSLSPGK                                                                                                                                                                                          |
| 2 | anti-CD40(G28.5)-Flag-VH-IgG1-pCR3                          | <u>MNFGFSLIFLVLVLKGVQCEVKLVPR</u> <b>QLDYKDDDDK</b> <u>ELDIQLQQSGPGLVKPSQSLSLT</u><br>CSVTGYSITITNYNWNWIRQFPGNKLEWNGYIRYDGTSEYTPSLKNRVSI TRDTSMNQFF<br>LRLTSVTPEDTATYYCARLDYWGQGLTVTVSS <b>SGSS</b> ASTKGPSVFPLAPSSKSTSGGTA<br>ALGCLVKDYFPEPVTVSWNSGALTSVHTFPAVLQSSGLYSLSSVTVTPSSSLGTQTYI<br>CNVNHKPSNTKVDKKEPKSCDKHTHTCPPCPAPELGGPSVFLFPPKPKDTLMI SRTP<br>VTCVVVDVSHEDPEVKFNWYVDGVEVHNAKTKPREEQYNSTYRVVSVLTVLHQDWLNGK<br>EYKCKVSNKALPAPIEKTISKAKGQPREPQVYTLPPSRDELTKNQVSLTCLVKGFYPSD<br>IAVEWESNGQPENNYKTPPVLDSDGSFFLYSKLTVDKSRWQQGNVFCSCVMHEALHNNH<br>YTQKSLSLSPGK                                                                                                                                                                                          |
| 3 | anti-CD40(G28.5)-Flag-VH-IgG2-pCR3                          | <u>MNFGFSLIFLVLVLKGVQCEVKLVPR</u> <b>QLDYKDDDDK</b> <u>ELDIQLQQSGPGLVKPSQSLSLT</u><br>CSVTGYSITITNYNWNWIRQFPGNKLEWNGYIRYDGTSEYTPSLKNRVSI TRDTSMNQFF<br>LRLTSVTPEDTATYYCARLDYWGQGLTVTVSS <b>SGSS</b> ASTKGPSVFPLAPCSRSTSESTA<br>ALGCLVKDYFPEPVTVSWNSGALTSVHTFPAVLQSSGLYSLSSVTVTPSSSLGTQTYI<br>CNVDHKPSNTKVDKTKVERKCCVECPAPVAVAGPSVFLFPPKPKDTLMI SRTP<br>VVDVSHEDPEVQFNWYVDGVEVHNAKTKPREEQFNSTFRVSVLTVVHQDWLNGKEYK<br>KVSNGKLPAPIEKTISKTKGQPREPQVYTLPPSREEMTKNQVSLTCLVKGFYPSDIAVE<br>WESNGQPENNYKTPPMLDSDGSFFLYSKLTVDKSRWQQGNVFCSCVMHEALHNNHYTQK<br>SLSLSPGK                                                                                                                                                                                                    |
| 4 | anti-CD40(G28.5)-Flag-VH-IgG4-pCR3                          | <u>MNFGFSLIFLVLVLKGVQCEVKLVPR</u> <b>QLDYKDDDDK</b> <u>ELDIQLQQSGPGLVKPSQSLSLT</u><br>CSVTGYSITITNYNWNWIRQFPGNKLEWNGYIRYDGTSEYTPSLKNRVSI TRDTSMNQFF<br>LRLTSVTPEDTATYYCARLDYWGQGLTVTVSS <b>SGSS</b> ASTKGPSVFPLAPCSRSTSESTA<br>ALGCLVKDYFPEPVTVSWNSGALTSVHTFPAVLQSSGLYSLSSVTVTPSSSLGTQTYI<br>CNVDHKPSNTKVDKRVESKYGPCCPAPPEFLGGPSVFLFPPKPKDTLMI SRTP<br>VVDVSDQEDPEVQFNWYVDGVEVHNAKTKPREEQFNSTYRVVSVLTVLHQDWLNGKEYK<br>CKVSNKGLPSSIEKTI SKAKGQPREPQVYTLPPSQEEMTKNQVSLTCLVKGFYPSDIAVE<br>WESNGQPENNYKTPPVLDSDGSFFLYSRLTVDKSRWQEGNVFCSCVMHEALHNNHYTQK<br>KSLSLSPGK                                                                                                                                                                                               |
| 5 | anti-CD40(G28.5)-Flag-VH-N297A-TNC-pCR3                     | <u>MNFGFSLIFLVLVLKGVQCEVKLVPR</u> <b>QLDYKDDDDK</b> <u>ELDIQLQQSGPGLVKPSQSLSLT</u><br>CSVTGYSITITNYNWNWIRQFPGNKLEWNGYIRYDGTSEYTPSLKNRVSI TRDTSMNQFF<br>LRLTSVTPEDTATYYCARLDYWGQGLTVTVSS <b>SGSS</b> ASTKGPSVFPLAPSSKSTSGGTA<br>ALGCLVKDYFPEPVTVSWNSGALTSVHTFPAVLQSSGLYSLSSVTVTPSSSLGTQTYI<br>CNVNHKPSNTKVDKKEPKSCDKHTHTCPPCPAPELGGPSVFLFPPKPKDTLMI SRTP<br>VTCVVVDVSHEDPEVKFNWYVDGVEVHNAKTKPREEQYASTYRVVSVLTVLHQDWLNGK<br>EYKCKVSNKALPAPIEKTISKAKGQPREPQVYTLPPSRDELTKNQVSLTCLVKGFYPSD<br>IAVEWESNGQPENNYKTPPVLDSDGSFFLYSKLTVDKSRWQQGNVFCSCVMHEALHNNH<br>YTQKSLSLSPGK <b>LEDIACGCAAAPDIKDLLSRLEELGLVSSLREOQTG</b>                                                                                                                                              |
| 6 | anti-CD40(G28.5)-Flag-VH-IgG1(N297A+E374R/E459G/S469Y)-pCR3 | <u>MNFGFSLIFLVLVLKGVQCEVKLVPR</u> <b>QLDYKDDDDK</b> <u>ELDIQLQQSGPGLVKPSQSLSLT</u><br>CSVTGYSITITNYNWNWIRQFPGNKLEWNGYIRYDGTSEYTPSLKNRVSI TRDTSMNQFF<br>LRLTSVTPEDTATYYCARLDYWGQGLTVTVSS <b>SGSS</b> ASTKGPSVFPLAPSSKSTSGGTA<br>ALGCLVKDYFPEPVTVSWNSGALTSVHTFPAVLQSSGLYSLSSVTVTPSSSLGTQTYI<br>CNVNHKPSNTKVDKKEPKSCDKHTHTCPPCPAPELGGPSVFLFPPKPKDTLMI SRTP<br>VTCVVVDVSHEDPEVKFNWYVDGVEVHNAKTKPREEQYASTYRVVSVLTVLHQDWLNGK<br>EYKCKVSNKALPAPIEKTISKAKGQPRRPQVYTLPPSRDELTKNQVSLTCLVKGFYPSD<br>IAVEWESNGQPENNYKTPPVLDSDGSFFLYSKLTVDKSRWQQGNVFCSCVMHEALHNNH<br>YTQKSLSLSPGK                                                                                                                                                                                          |
| 7 | anti-CD40(G28.5)-Flag-VH-N297A-scFv-anti-CD40(G28.5)-pCR3   | <u>MNFGFSLIFLVLVLKGVQCEVKLVPR</u> <b>QLDYKDDDDK</b> <u>ELDIQLQQSGPGLVKPSQSLSLT</u><br>CSVTGYSITITNYNWNWIRQFPGNKLEWNGYIRYDGTSEYTPSLKNRVSI TRDTSMNQFF<br>LRLTSVTPEDTATYYCARLDYWGQGLTVTVSS <b>SGSS</b> ASTKGPSVFPLAPSSKSTSGGTA<br>ALGCLVKDYFPEPVTVSWNSGALTSVHTFPAVLQSSGLYSLSSVTVTPSSSLGTQTYI<br>CNVNHKPSNTKVDKKEPKSCDKHTHTCPPCPAPELGGPSVFLFPPKPKDTLMI SRTP<br>VTCVVVDVSHEDPEVKFNWYVDGVEVHNAKTKPREEQYASTYRVVSVLTVLHQDWLNGK<br>EYKCKVSNKALPAPIEKTISKAKGQPREPQVYTLPPSRDELTKNQVSLTCLVKGFYPSD<br>IAVEWESNGQPENNYKTPPVLDSDGSFFLYSKLTVDKSRWQQGNVFCSCVMHEALHNNH<br>YTQKSLSLSPGK <b>LEDIVMTQNPLSLPVLGDEASISCRSSAOLSENSNGTFLNWFQKP</b><br><b>QSPQLLIYRVSNRFSVPPDRFSGSGSDFTLKISRVEAEDLVYFCQVTHVPTFG</b><br><b>GGTTLEIKGGGGGGGGGGGGDIQLQQSGPGLVKPSQSLSLTCSVTGYSITITNYNWN</b> |

|    |                                                                          |                                                                                                                                                                                                                                                                                                                                                                                                                                                                                                                                                                                                                                                                                                                                                                                                                                                                                 |
|----|--------------------------------------------------------------------------|---------------------------------------------------------------------------------------------------------------------------------------------------------------------------------------------------------------------------------------------------------------------------------------------------------------------------------------------------------------------------------------------------------------------------------------------------------------------------------------------------------------------------------------------------------------------------------------------------------------------------------------------------------------------------------------------------------------------------------------------------------------------------------------------------------------------------------------------------------------------------------|
|    |                                                                          | <i>WIRQFPGNKLEWGMGIRYDGTSEYTPSLKNRVSI TRDTSMNQFFLRLLTSVTPEDTATY<br/>CARLDYWGQGLTVTVSS</i>                                                                                                                                                                                                                                                                                                                                                                                                                                                                                                                                                                                                                                                                                                                                                                                       |
| 8  | anti-CD40(G28.5)-Flag-<br>VL-light-pCR3                                  | <i>MNFGFSLIFLVLVLKGVQCEVKLVPRQLDYKDDDDK<b>EL</b>DI VMTQNPLSLPVSLGDEASI<br/>SCRSSQSLNSNGNTFLNWFQKPGQSPQLLIYRVSNRFSVGPDRFSGSGSGTDFTLKI<br/>SRVEADLGVYFCLQVTHVPTFFGGTTLEIK<b>SE</b>IKRTVAAPSVFIFPPSDEQLKSGT<br/>ASVVCLLNNFYPREAKVQWKVDNALQSGNSQESVTEQDSKDSSTYLSSTLTLSKADYK<br/>HKVYACEVTHQQLSSPVTKSFNRGEC</i>                                                                                                                                                                                                                                                                                                                                                                                                                                                                                                                                                                      |
| 9  | anti-CD40(ChiLob)-Flag-<br>VH-IgG1(N297A+<br>E374R/E459G/S469Y)-<br>pCR3 | <i>MNFGFSLIFLVLVLKGVQCEVKLVPRQLDYKDDDDK<b>EF</b>EVQLQQSGPDLVPGASVKIS<br/>CKTSGYTFTEYIMHWWKQSHGKSLEWIGGIIPNNGGTSYNQKFKDKATMTVDKSSSTGY<br/>MELRSLTSEDSAVYYCTRREYVGRNYALDYWGQGLTVTVSS<b>RS</b>SSASTKGPSVFFLAP<br/>SSKSTSGGTAALGCLVKDYFPEPVTVSWNSGALTSVHTFPAVLQSSGLYSLSSVTVTP<br/>SSSLGTQTYICNVNHKPSNTKVDKVEPKSCDKHTCPCPCPAPELLGGPSVFLFPPKPK<br/>DTLMSRTPPEVTCVVDVSHEDPEVKFNWYVDGVEVHNAKTKPREEQYASTYRVVSVLT<br/>VLHQDWLNGKEYKCKVSNKALPAPIEKTISKAKGQPRRPQVYTLPPSRDELTKNQVSLT<br/>CLVKGFYPSDIAVEWESNGQPENNYKTPPVLDSDGSFFLYSKLTVDKSRWQQGNVFC<br/>SVMHGALHNHYTQKYLSPGK</i>                                                                                                                                                                                                                                                                                                              |
| 10 | anti-CD40(ChiLob)-Flag-<br>VH-N297A-pCR3                                 | <i>MNFGFSLIFLVLVLKGVQCEVKLVPRQLDYKDDDDK<b>EF</b>EVQLQQSGPDLVPGASVKIS<br/>CKTSGYTFTEYIMHWWKQSHGKSLEWIGGIIPNNGGTSYNQKFKDKATMTVDKSSSTGY<br/>MELRSLTSEDSAVYYCTRREYVGRNYALDYWGQGLTVTVSS<b>RS</b>SSASTKGPSVFFLAP<br/>SSKSTSGGTAALGCLVKDYFPEPVTVSWNSGALTSVHTFPAVLQSSGLYSLSSVTVTP<br/>SSSLGTQTYICNVNHKPSNTKVDKVEPKSCDKHTCPCPCPAPELLGGPSVFLFPPKPK<br/>DTLMSRTPPEVTCVVDVSHEDPEVKFNWYVDGVEVHNAKTKPREEQYASTYRVVSVLT<br/>VLHQDWLNGKEYKCKVSNKALPAPIEKTISKAKGQPRRPQVYTLPPSRDELTKNQVSLT<br/>CLVKGFYPSDIAVEWESNGQPENNYKTPPVLDSDGSFFLYSKLTVDKSRWQQGNVFC<br/>SVMHEALHNHYTQKLSLSPGK</i>                                                                                                                                                                                                                                                                                                             |
| 11 | anti-CD40(ChiLob)-Flag-<br>VH-N297A-scFv-anti-<br>CD40(ChiLob)-pCR3      | <i>MNFGFSLIFLVLVLKGVQCEVKLVPRQLDYKDDDDK<b>EF</b>EVQLQQSGPDLVPGASVKIS<br/>CKTSGYTFTEYIMHWWKQSHGKSLEWIGGIIPNNGGTSYNQKFKDKATMTVDKSSSTGY<br/>MELRSLTSEDSAVYYCTRREYVGRNYALDYWGQGLTVTVSS<b>RS</b>SSASTKGPSVFFLAP<br/>SSKSTSGGTAALGCLVKDYFPEPVTVSWNSGALTSVHTFPAVLQSSGLYSLSSVTVTP<br/>SSSLGTQTYICNVNHKPSNTKVDKVEPKSCDKHTCPCPCPAPELLGGPSVFLFPPKPK<br/>DTLMSRTPPEVTCVVDVSHEDPEVKFNWYVDGVEVHNAKTKPREEQYASTYRVVSVLT<br/>VLHQDWLNGKEYKCKVSNKALPAPIEKTISKAKGQPRRPQVYTLPPSRDELTKNQVSLT<br/>CLVKGFYPSDIAVEWESNGQPENNYKTPPVLDSDGSFFLYSKLTVDKSRWQQGNVFC<br/>SVMHEALHNHYTQKLSLSPGK<b>LE</b>EVQLQQSGPDLVPGASVKISCKTSGYTFTEYIMH<br/>WVKQSHGKSLEWIGGIIPNNGGTSYNQKFKDKATMTVDKSSSTGYMELRSLTSEDSAVY<br/>YCTRREYVGRNYALDYWGQGLTVTVSS<b>RS</b>STK<b>GP</b>LE<b>EGE</b>GF<b>SEA</b>QLDIQMTQSSLS<br/>ASLGDVRTITCSASQGINNYLNWYQQKPDGTVKLLIYYTSSLHSGVPSRFSGSGSDTY<br/>SLTISNLEPEDIATYYCQYQYVNLPTFFGGTKLEIK</i> |
| 12 | anti-CD40(ChiLob)-Flag-<br>VH-N297A-TNC-pCR3                             | <i>MNFGFSLIFLVLVLKGVQCEVKLVPRQLDYKDDDDK<b>EF</b>EVQLQQSGPDLVPGASVKIS<br/>CKTSGYTFTEYIMHWWKQSHGKSLEWIGGIIPNNGGTSYNQKFKDKATMTVDKSSSTGY<br/>MELRSLTSEDSAVYYCTRREYVGRNYALDYWGQGLTVTVSS<b>RS</b>SSASTKGPSVFFLAP<br/>SSKSTSGGTAALGCLVKDYFPEPVTVSWNSGALTSVHTFPAVLQSSGLYSLSSVTVTP<br/>SSSLGTQTYICNVNHKPSNTKVDKVEPKSCDKHTCPCPCPAPELLGGPSVFLFPPKPK<br/>DTLMSRTPPEVTCVVDVSHEDPEVKFNWYVDGVEVHNAKTKPREEQYASTYRVVSVLT<br/>VLHQDWLNGKEYKCKVSNKALPAPIEKTISKAKGQPRRPQVYTLPPSRDELTKNQVSLT<br/>CLVKGFYPSDIAVEWESNGQPENNYKTPPVLDSDGSFFLYSKLTVDKSRWQQGNVFC<br/>SVMHEALHNHYTQKLSLSPGK<b>LE</b>DIACGCAAPDIKDLLSRLEELGLVSSLREQGTG</i>                                                                                                                                                                                                                                                                   |
| 13 | anti-CD40(ChiLob)-Flag-<br>VH-IgG1-pCR3                                  | <i>MNFGFSLIFLVLVLKGVQCEVKLVPRQLDYKDDDDK<b>EF</b>EVQLQQSGPDLVPGASVKIS<br/>CKTSGYTFTEYIMHWWKQSHGKSLEWIGGIIPNNGGTSYNQKFKDKATMTVDKSSSTGY<br/>MELRSLTSEDSAVYYCTRREYVGRNYALDYWGQGLTVTVSS<b>RS</b>SSASTKGPSVFFLAP<br/>SSKSTSGGTAALGCLVKDYFPEPVTVSWNSGALTSVHTFPAVLQSSGLYSLSSVTVTP<br/>SSSLGTQTYICNVNHKPSNTKVDKVEPKSCDKHTCPCPCPAPELLGGPSVFLFPPKPK<br/>DTLMSRTPPEVTCVVDVSHEDPEVKFNWYVDGVEVHNAKTKPREEQYASTYRVVSVLT<br/>VLHQDWLNGKEYKCKVSNKALPAPIEKTISKAKGQPRRPQVYTLPPSRDELTKNQVSLT<br/>CLVKGFYPSDIAVEWESNGQPENNYKTPPVLDSDGSFFLYSKLTVDKSRWQQGNVFC<br/>SVMHEALHNHYTQKLSLSPGK</i>                                                                                                                                                                                                                                                                                                             |
| 14 | anti-CD40(ChiLob)-Flag-<br>VH-IgG2-pCR3                                  | <i>MNFGFSLIFLVLVLKGVQCEVKLVPRQLDYKDDDDK<b>EF</b>EVQLQQSGPDLVPGASVKIS<br/>CKTSGYTFTEYIMHWWKQSHGKSLEWIGGIIPNNGGTSYNQKFKDKATMTVDKSSSTGY<br/>MELRSLTSEDSAVYYCTRREYVGRNYALDYWGQGLTVTVSS<b>RS</b>SSASTKGPSVFFLAP<br/>CSRSTSESTAALGCLVKDYFPEPVTVSWNSGALTSVHTFPAVLQSSGLYSLSSVTVTP<br/>SSNFGTQTYICNVNDHKPSNTKVDKTVKCCVCEPCPCPAPVAGPSVFLFPPKPKDTLM<br/>ISRTPPEVTCVVDVSHEDPEVQFNWYVDGVEVHNAKTKPREEQFNSTFRVSVLTVVHQ<br/>DWLNGKEYKCKVSNKGLPAPIEKTISKAKGQPRRPQVYTLPPSRDELTKNQVSLTCLVK<br/>GFYPSDIAVEWESNGQPENNYKTPPMLDSDGSFFLYSKLTVDKSRWQQGNVFC<br/>SVMHEALHNHYTQKLSLSPGK</i>                                                                                                                                                                                                                                                                                                                 |
| 15 | anti-CD40(ChiLob)-Flag-<br>VH-IgG4-pCR3                                  | <i>MNFGFSLIFLVLVLKGVQCEVKLVPRQLDYKDDDDK<b>EF</b>EVQLQQSGPDLVPGASVKIS<br/>CKTSGYTFTEYIMHWWKQSHGKSLEWIGGIIPNNGGTSYNQKFKDKATMTVDKSSSTGY<br/>MELRSLTSEDSAVYYCTRREYVGRNYALDYWGQGLTVTVSS<b>RS</b>SSASTKGPSVFFLAP<br/>CSRSTSESTAALGCLVKDYFPEPVTVSWNSGALTSVHTFPAVLQSSGLYSLSSVTVTP<br/>SSSLGTQTYICNVNDHKPSNTKVDKRVESKYGPCPCPAPELLGGPSVFLFPPKPKDTL<br/>MISRTPPEVTCVVDVSHEDPEVQFNWYVDGVEVHNAKTKPREEQFNSTYRVVSVLTVLH<br/>QDWLNGKEYKCKVSNKGLPSSIEKTISKAKGQPRRPQVYTLPPSQEEMTKNQVSLTCLV<br/>KGFYPSDIAVEWESNGQPENNYKTPPVLDSDGSFFLYSRLTVDKSRWQEGNVFSCSVM<br/>HEALHNHYTQKLSLSPGK</i>                                                                                                                                                                                                                                                                                                              |
| 16 | anti-CD40(ChiLob)-Flag-<br>VL-light-pCR3                                 | <i>MNFGFSLIFLVLVLKGVQCEVKLVPRQLDYKDDDDK<b>EL</b>DIQMTQTTSSLSASLGDVRTI<br/>TCSASQGINNYLNWYQQKPDGTVKLLIYYTSSLHSGVPSRFSGSGSDTYSLTISNLEP<br/>EDIATYYCQYQYVNLPTFFGGTKLEIK<b>SE</b>IKRTVAAPSVFIFPPSDEQLKSGTASVVC</i>                                                                                                                                                                                                                                                                                                                                                                                                                                                                                                                                                                                                                                                                  |

|    |                                                                       |                                                                                                                                                                                                                                                                                                                                                                                                                                                                                                                                                                                                                                                                                                                                                                                                                                                                                                     |
|----|-----------------------------------------------------------------------|-----------------------------------------------------------------------------------------------------------------------------------------------------------------------------------------------------------------------------------------------------------------------------------------------------------------------------------------------------------------------------------------------------------------------------------------------------------------------------------------------------------------------------------------------------------------------------------------------------------------------------------------------------------------------------------------------------------------------------------------------------------------------------------------------------------------------------------------------------------------------------------------------------|
|    |                                                                       | LLNNFYPREAKVQWKVDNALQSGNSQESVTEQDSDKSTYLSSTLTLKADYKHKVYA<br>CEVTHQGLSSPVTKSFNRGEC                                                                                                                                                                                                                                                                                                                                                                                                                                                                                                                                                                                                                                                                                                                                                                                                                   |
| 17 | anti-CD40(ADC)-Flag-<br>VH-N297A-pCR3                                 | MNFGFSLIFLVLVLKGVQCEVKLVPR <b>QLDYKDDDDK</b> <b>EF</b> EVQLLES <sup>GGGLVQ</sup> PGGSLRLS<br>CAASGFTFSTYGMHWVRQAPGKGLEWLSYISGGSSYIFYADSVRGRFTISRDNSENALY<br>LQMNSLRAEDTAVYYCARILRGGSGMDLWGQGLTVTVSS <b>RS</b> SSASTKGPSVFPLAPSSK<br>STSGGTAALGCLVKDYFPEPVTVSWNSGALTS <sup>GVHTFPAVLQSSGLYSLSSVVTVPSSS</sup><br>LGTQTYICNVNHKPSNTKVDKVEPKSCDKTHTCPCPAPELLGGPSVFLFPPKPKDTL<br>MISRTPEVTCVVVDVSHEDPEVKFNWYVDGVEVHNAKTKPREEQYASTYRVVSVLTVLH<br>QDWLNGKEYKCKVSNKALPAPIEKTISKAKGQPREPQVYTLPPSRDELTKNQVSLTCLV<br>KGFYPSDIAVEWESNGQPENNYKTTTPVLDSDGSFFLYSKLTVDKSRWQQGNVFCSSVM<br>HEALHNHYTQKSLSLSPGK                                                                                                                                                                                                                                                                                                        |
| 18 | anti-CD40(ADC)-Flag-<br>VH-IgG1(N297A+<br>E374R/E459G/S469Y)-<br>pCR3 | MNFGFSLIFLVLVLKGVQCEVKLVPR <b>QLDYKDDDDK</b> <b>EF</b> EVQLLES <sup>GGGLVQ</sup> PGGSLRLS<br>CAASGFTFSTYGMHWVRQAPGKGLEWLSYISGGSSYIFYADSVRGRFTISRDNSENALY<br>LQMNSLRAEDTAVYYCARILRGGSGMDLWGQGLTVTVSS <b>RS</b> SSASTKGPSVFPLAPSSK<br>STSGGTAALGCLVKDYFPEPVTVSWNSGALTS <sup>GVHTFPAVLQSSGLYSLSSVVTVPSSS</sup><br>LGTQTYICNVNHKPSNTKVDKVEPKSCDKTHTCPCPAPELLGGPSVFLFPPKPKDTL<br>MISRTPEVTCVVVDVSHEDPEVKFNWYVDGVEVHNAKTKPREEQYASTYRVVSVLTVLH<br>QDWLNGKEYKCKVSNKALPAPIEKTISKAKGQPRRPQVYTLPPSRDELTKNQVSLTCLV<br>KGFYPSDIAVEWESNGQPENNYKTTTPVLDSDGSFFLYSKLTVDKSRWQQGNVFCSSVM<br>HGALHNHYTQKYLSPGK                                                                                                                                                                                                                                                                                                          |
| 19 | anti-CD40(ADC)-Flag-<br>VH-IgG1-pCR3                                  | MNFGFSLIFLVLVLKGVQCEVKLVPR <b>QLDYKDDDDK</b> <b>EF</b> EVQLLES <sup>GGGLVQ</sup> PGGSLRLS<br>CAASGFTFSTYGMHWVRQAPGKGLEWLSYISGGSSYIFYADSVRGRFTISRDNSENALY<br>LQMNSLRAEDTAVYYCARILRGGSGMDLWGQGLTVTVSS <b>RS</b> SSASTKGPSVFPLAPSSK<br>STSGGTAALGCLVKDYFPEPVTVSWNSGALTS <sup>GVHTFPAVLQSSGLYSLSSVVTVPSSS</sup><br>LGTQTYICNVNHKPSNTKVDKVEPKSCDKTHTCPCPAPELLGGPSVFLFPPKPKDTL<br>MISRTPEVTCVVVDVSHEDPEVKFNWYVDGVEVHNAKTKPREEQYASTYRVVSVLTVLH<br>QDWLNGKEYKCKVSNKALPAPIEKTISKAKGQPREPQVYTLPPSRDELTKNQVSLTCLV<br>KGFYPSDIAVEWESNGQPENNYKTTTPVLDSDGSFFLYSKLTVDKSRWQQGNVFCSSVM<br>HEALHNHYTQKSLSLSPGK                                                                                                                                                                                                                                                                                                        |
| 20 | anti-CD40(ADC)-Flag-<br>VH-IgG2-pCR3                                  | MNFGFSLIFLVLVLKGVQCEVKLVPR <b>QLDYKDDDDK</b> <b>EF</b> EVQLLES <sup>GGGLVQ</sup> PGGSLRLS<br>CAASGFTFSTYGMHWVRQAPGKGLEWLSYISGGSSYIFYADSVRGRFTISRDNSENALY<br>LQMNSLRAEDTAVYYCARILRGGSGMDLWGQGLTVTVSS <b>RS</b> SSASTKGPSVFPLAPCSR<br>STSESTAALGCLVKDYFPEPVTVSWNSGALTS <sup>GVHTFPAVLQSSGLYSLSSVVTVPSSN</sup><br>FGTQTYTCNVDHKPSNTKVDKTVKRCCKVECPPCPAPPVAGPSVFLFPPKPKDTLMISR<br>TPEVTCVVVDVSHEDPEVQFNWYVDGVEVHNAKTKPREEQFNSTYRVVSVLTVVHQDWL<br>NGKEYKCKVSNKGLPAPIEKTISKAKGQPREPQVYTLPPSRDELTKNQVSLTCLVKGFY<br>PSDIAVEWESNGQPENNYKTTTPMLDSDGSFFLYSKLTVDKSRWQQGNVFCSSVMHEAL<br>HNHYTQKSLSLSPGK                                                                                                                                                                                                                                                                                                          |
| 21 | anti-CD40(ADC)-Flag-<br>VH-IgG4-pCR3                                  | MNFGFSLIFLVLVLKGVQCEVKLVPR <b>QLDYKDDDDK</b> <b>EF</b> EVQLLES <sup>GGGLVQ</sup> PGGSLRLS<br>CAASGFTFSTYGMHWVRQAPGKGLEWLSYISGGSSYIFYADSVRGRFTISRDNSENALY<br>LQMNSLRAEDTAVYYCARILRGGSGMDLWGQGLTVTVSS <b>RS</b> SSASTKGPSVFPLAPCSR<br>STSESTAALGCLVKDYFPEPVTVSWNSGALTS <sup>GVHTFPAVLQSSGLYSLSSVVTVPSSS</sup><br>LGTQTYTCNVDHKPSNTKVDKRVESKYGPPCPCPAPEFLGGPSVFLFPPKPKDTLMISR<br>RTPVTCVVVDVSDQEDPEVQFNWYVDGVEVHNAKTKPREEQFNSTYRVVSVLTVLHQDW<br>LNGKEYKCKVSNKGLPSSIEKTISKAKGQPREPQVYTLPPSQEEMTKNQVSLTCLVKGF<br>YPSDIAVEWESNGQPENNYKTTTPVLDSDGSFFLYSRLTVDKSRWQEGNVFCSSVMHEA<br>LHNHYTQKSLSLSPGK                                                                                                                                                                                                                                                                                                         |
| 22 | anti-CD40(ADC)-Flag-<br>VH-N297A-scFv-anti-<br>CD40(ADC)-pCR3         | MNFGFSLIFLVLVLKGVQCEVKLVPR <b>QLDYKDDDDK</b> <b>EF</b> EVQLLES <sup>GGGLVQ</sup> PGGSLRLS<br>CAASGFTFSTYGMHWVRQAPGKGLEWLSYISGGSSYIFYADSVRGRFTISRDNSENALY<br>LQMNSLRAEDTAVYYCARILRGGSGMDLWGQGLTVTVSS <b>RS</b> SSASTKGPSVFPLAPSSK<br>STSGGTAALGCLVKDYFPEPVTVSWNSGALTS <sup>GVHTFPAVLQSSGLYSLSSVVTVPSSS</sup><br>LGTQTYICNVNHKPSNTKVDKVEPKSCDKTHTCPCPAPELLGGPSVFLFPPKPKDTL<br>MISRTPEVTCVVVDVSHEDPEVKFNWYVDGVEVHNAKTKPREEQYASTYRVVSVLTVLH<br>QDWLNGKEYKCKVSNKALPAPIEKTISKAKGQPREPQVYTLPPSRDELTKNQVSLTCLV<br>KGFYPSDIAVEWESNGQPENNYKTTTPVLDSDGSFFLYSKLTVDKSRWQQGNVFCSSVM<br>HEALHNHYTQKSLSLSPGK <b>LE</b> EVQLLES <sup>GGGLVQ</sup> PGGSLRLSCAASGFTFSTYGMHWVR<br>QAPGKGLEWLSYISGGSSYIFYADSVRGRFTISRDNSENALYRAEDTAVYYCA<br>RILRGGSGMDLWGQGLTVTVSS <b>RS</b> <b>STKGPKEGEFSEAQL</b> QSVLTQPPASGTPGQRV<br>TISCTGSSNIGAGYVWYQQLPGTAPKLLIYGNINRPSGVPDRFSGSKSGTSASLAI<br>SGLRSEDEADYYCAAWDKSISGLVFGGGTKLTVLG |
| 23 | anti-CD40(ADC)-Flag-<br>VH-N297A-TNC-pCR3                             | MNFGFSLIFLVLVLKGVQCEVKLVPR <b>QLDYKDDDDK</b> <b>EF</b> EVQLLES <sup>GGGLVQ</sup> PGGSLRLS<br>CAASGFTFSTYGMHWVRQAPGKGLEWLSYISGGSSYIFYADSVRGRFTISRDNSENALY<br>LQMNSLRAEDTAVYYCARILRGGSGMDLWGQGLTVTVSS <b>RS</b> SSASTKGPSVFPLAPSSK<br>STSGGTAALGCLVKDYFPEPVTVSWNSGALTS <sup>GVHTFPAVLQSSGLYSLSSVVTVPSSS</sup><br>LGTQTYICNVNHKPSNTKVDKVEPKSCDKTHTCPCPAPELLGGPSVFLFPPKPKDTL<br>MISRTPEVTCVVVDVSHEDPEVKFNWYVDGVEVHNAKTKPREEQYASTYRVVSVLTVLH<br>QDWLNGKEYKCKVSNKALPAPIEKTISKAKGQPREPQVYTLPPSRDELTKNQVSLTCLV<br>KGFYPSDIAVEWESNGQPENNYKTTTPVLDSDGSFFLYSKLTVDKSRWQQGNVFCSSVM<br>HEALHNHYTQKSLSLSPGK <b>LE</b> DIACGCAAAPDIKDLLSRLELGLVSLR <b>EQGTG</b>                                                                                                                                                                                                                                                     |
| 24 | anti-CD40(ADC)-Flag-<br>VL-light-pCR3                                 | MNFGFSLIFLVLVLKGVQCEVKLVPR <b>QLDYKDDDDK</b> <b>EL</b> QSVLTQPPASGTPGQRVTIS<br>CTGSSNIGAGYVWYQQLPGTAPKLLIYGNINRPSGVPDRFSGSKSGTSASLAI <b>SGL</b><br>RSEDEADYYCAAWDKSISGLVFGGGTKLTVLG <b>GS</b> EIKRTVAAPSVFIFPPSDEQLKSGT<br>ASVCLLNNFYPREAKVQWKVDNALQSGNSQESVTEQDSDKSTYLSSTLTLKADYK<br>HKVYACEVTHQGLSSPVTKSFNRGEC                                                                                                                                                                                                                                                                                                                                                                                                                                                                                                                                                                                    |
| 25 | anti-CD40(APX)-Flag-<br>VH-IgG1(N297A+)                               | MNFGFSLIFLVLVLKGVQCEVKLVPR <b>QLDYKDDDDK</b> <b>EF</b> QSLLES <sup>GGDLVQ</sup> PGASLTLTC<br>TASGFSSTYVWVRQAPGKLEWIACTIYTGDTNYSASWAKGRFTISKPSSTVTLQ<br>MTSLTPADTATYFCARPDITYGFAINFWGPTLTVTVSS <b>RS</b> SSASTKGPSVFPLAPSSKS                                                                                                                                                                                                                                                                                                                                                                                                                                                                                                                                                                                                                                                                         |

|    |                                                               |                                                                                                                                                                                                                                                                                                                                                                                                                                                                                                                                                                                                                                                                                                                                                                                                                                                                |
|----|---------------------------------------------------------------|----------------------------------------------------------------------------------------------------------------------------------------------------------------------------------------------------------------------------------------------------------------------------------------------------------------------------------------------------------------------------------------------------------------------------------------------------------------------------------------------------------------------------------------------------------------------------------------------------------------------------------------------------------------------------------------------------------------------------------------------------------------------------------------------------------------------------------------------------------------|
|    | E374R/E459G/S469Y)-pCR3                                       | TSGGTAALGCLVKDYFPEPVTVSWNSGALTSVHTFPAVLQSSGLYSLSSVTVPSSSL<br>GTQTYICNVNHKPSNTKVDKVEPKSCDKTHTCPPCPAPELGGPSVFLFPPKPKDTLM<br>ISRTPQVTCVVVDVSHEDPEVKFNWYVDGVEVHNAKTKPREEQYASTYRVVSVLTVLHQ<br>DWLNGKEYKCKVSNKALPAPIEKTISKAKGQPRRPQVYTLPPSRDELTKNQVSLTCLVK<br>GFYPSDIAVEWESNGQPENNYKTTTPVLDSDGSFFLYSKLTVDKSRWQQGNVFCSSVMH<br>EALHNHYTQKLSLSLSPGK                                                                                                                                                                                                                                                                                                                                                                                                                                                                                                                     |
| 26 | anti-CD40(APX)-Flag-VH-IgG1-pCR3                              | MNFGFSLIFLVLVLRGQCEVKLVPR <b>QLDYKDDDDK<b>EF</b>QSL</b> EESSGGDLVKPGASLTLTC<br>TASGFSFSSTYVCWVRQAPGKLEWIAICYTGDGTNYSASWAKGRFTISKPSSTTVTLQ<br>MTSLTPADTATYFCARPDITYGFAINFWGPGTLVTVSSRSASASTKGPSVFLAPSSKS<br>TSGGTAALGCLVKDYFPEPVTVSWNSGALTSVHTFPAVLQSSGLYSLSSVTVPSSSL<br>GTQTYICNVNHKPSNTKVDKVEPKSCDKTHTCPPCPAPELGGPSVFLFPPKPKDTLM<br>ISRTPQVTCVVVDVSHEDPEVKFNWYVDGVEVHNAKTKPREEQYASTYRVVSVLTVLHQ<br>DWLNGKEYKCKVSNKALPAPIEKTISKAKGQPREPQVYTLPPSRDELTKNQVSLTCLVK<br>GFYPSDIAVEWESNGQPENNYKTTTPVLDSDGSFFLYSKLTVDKSRWQQGNVFCSSVMH<br>EALHNHYTQKLSLSLSPGK                                                                                                                                                                                                                                                                                                          |
| 27 | anti-CD40(APX)-Flag-VH-IgG2-pCR3                              | MNFGFSLIFLVLVLRGQCEVKLVPR <b>QLDYKDDDDK<b>EF</b>QSL</b> EESSGGDLVKPGASLTLTC<br>TASGFSFSSTYVCWVRQAPGKLEWIAICYTGDGTNYSASWAKGRFTISKPSSTTVTLQ<br>MTSLTPADTATYFCARPDITYGFAINFWGPGTLVTVSSRSASASTKGPSVFLAPCSR<br>TSESTAALGCLVKDYFPEPVTVSWNSGALTSVHTFPAVLQSSGLYSLSSVTVPSN<br>GTQTYICNVNDHKPSNTKVDKTVVERKCCVEPCPAPPVAGPSVFLFPPKPKDTLMISR<br>PEVTCVVVDVSHEDPEVQFNWYVDGVEVHNAKTKPREEQFNSTFRVSVLTVVHQDWL<br>GKEYKCKVSNKGLPAPIEKTISKTKGQPREPQVYTLPPSRDEMTKNQVSLTCLVKGFY<br>PSDIAVEWESNGQPENNYKTTTPMLDSDGSFFLYSKLTVDKSRWQQGNVFCSSVMHEAL<br>HNHYTQKLSLSLSPGK                                                                                                                                                                                                                                                                                                                  |
| 28 | anti-CD40(APX)-Flag-VH-IgG4-pCR3                              | MNFGFSLIFLVLVLRGQCEVKLVPR <b>QLDYKDDDDK<b>EF</b>QSL</b> EESSGGDLVKPGASLTLTC<br>TASGFSFSSTYVCWVRQAPGKLEWIAICYTGDGTNYSASWAKGRFTISKPSSTTVTLQ<br>MTSLTPADTATYFCARPDITYGFAINFWGPGTLVTVSSRSASASTKGPSVFLAPCSR<br>TSESTAALGCLVKDYFPEPVTVSWNSGALTSVHTFPAVLQSSGLYSLSSVTVPSSSL<br>GTQTYICNVNDHKPSNTKVDKRVESKYGPPCPCPAPFLGGPSVFLFPPKPKDTLMISR<br>TPEVTCVVVDVSDQEDPEVQFNWYVDGVEVHNAKTKPREEQFNSTYRVVSVLTVLHQDWL<br>NGKEYKCKVSNKGLPSSIEKTISKAKGQPREPQVYTLPPSQEEMTKNQVSLTCLVKGFY<br>PSDIAVEWESNGQPENNYKTTTPVLDSDGSFFLYSRLTVDKSRWQEGNVFCSSVMHEAL<br>HNHYTQKLSLSLSPGK                                                                                                                                                                                                                                                                                                            |
| 29 | anti-CD40(APX)-Flag-VH-N297A-pCR3                             | MNFGFSLIFLVLVLRGQCEVKLVPR <b>QLDYKDDDDK<b>EF</b>QSL</b> EESSGGDLVKPGASLTLTC<br>TASGFSFSSTYVCWVRQAPGKLEWIAICYTGDGTNYSASWAKGRFTISKPSSTTVTLQ<br>MTSLTPADTATYFCARPDITYGFAINFWGPGTLVTVSSRSASASTKGPSVFLAPSSKS<br>TSGGTAALGCLVKDYFPEPVTVSWNSGALTSVHTFPAVLQSSGLYSLSSVTVPSSSL<br>GTQTYICNVNHKPSNTKVDKVEPKSCDKTHTCPPCPAPELGGPSVFLFPPKPKDTLM<br>ISRTPQVTCVVVDVSHEDPEVKFNWYVDGVEVHNAKTKPREEQYASTYRVVSVLTVLHQ<br>DWLNGKEYKCKVSNKALPAPIEKTISKAKGQPREPQVYTLPPSRDELTKNQVSLTCLVK<br>GFYPSDIAVEWESNGQPENNYKTTTPVLDSDGSFFLYSKLTVDKSRWQQGNVFCSSVMH<br>EALHNHYTQKLSLSLSPGK                                                                                                                                                                                                                                                                                                          |
| 30 | anti-CD40(APX)-Flag-VH-N297A-scFv-anti-CD40(APX)-pCR3         | MNFGFSLIFLVLVLRGQCEVKLVPR <b>QLDYKDDDDK<b>EF</b>QSL</b> EESSGGDLVKPGASLTLTC<br>TASGFSFSSTYVCWVRQAPGKLEWIAICYTGDGTNYSASWAKGRFTISKPSSTTVTLQ<br>MTSLTPADTATYFCARPDITYGFAINFWGPGTLVTVSSRSASASTKGPSVFLAPSSKS<br>TSGGTAALGCLVKDYFPEPVTVSWNSGALTSVHTFPAVLQSSGLYSLSSVTVPSSSL<br>GTQTYICNVNHKPSNTKVDKVEPKSCDKTHTCPPCPAPELGGPSVFLFPPKPKDTLM<br>ISRTPQVTCVVVDVSHEDPEVKFNWYVDGVEVHNAKTKPREEQYASTYRVVSVLTVLHQ<br>DWLNGKEYKCKVSNKALPAPIEKTISKAKGQPREPQVYTLPPSRDELTKNQVSLTCLVK<br>GFYPSDIAVEWESNGQPENNYKTTTPVLDSDGSFFLYSKLTVDKSRWQQGNVFCSSVMH<br>EALHNHYTQKLSLSLSPGK <b>LE</b> QSL <b>EESSGGDLVKPGASLTLCTASGFSFSSTYVCWVRQA</b><br><b>PGKLEWIAICYTGDGTNYSASWAKGRFTISKPSSTTVTLQMTSLTPADTATYFCARPD</b><br><b>ITYGFAINFWGPGTLVTVSSRSSTKGP<b>KEEGEFSEAQL</b>DI</b> VMTQTPSSASEPVGTVT<br>IKCQASQSISSRLAWYQKPGQPPKLLIYRASTLASGVPSRFKSGSGTEFTLTISDLE<br>CADAATYYCQCTGYGISWPIGGGTEVVVK |
| 31 | anti-CD40(APX)-Flag-VH-N297A-TNC-pCR3                         | MNFGFSLIFLVLVLRGQCEVKLVPR <b>QLDYKDDDDK<b>EF</b>QSL</b> EESSGGDLVKPGASLTLTC<br>TASGFSFSSTYVCWVRQAPGKLEWIAICYTGDGTNYSASWAKGRFTISKPSSTTVTLQ<br>MTSLTPADTATYFCARPDITYGFAINFWGPGTLVTVSSRSASASTKGPSVFLAPSSKS<br>TSGGTAALGCLVKDYFPEPVTVSWNSGALTSVHTFPAVLQSSGLYSLSSVTVPSSSL<br>GTQTYICNVNHKPSNTKVDKVEPKSCDKTHTCPPCPAPELGGPSVFLFPPKPKDTLM<br>ISRTPQVTCVVVDVSHEDPEVKFNWYVDGVEVHNAKTKPREEQYASTYRVVSVLTVLHQ<br>DWLNGKEYKCKVSNKALPAPIEKTISKAKGQPREPQVYTLPPSRDELTKNQVSLTCLVK<br>GFYPSDIAVEWESNGQPENNYKTTTPVLDSDGSFFLYSKLTVDKSRWQQGNVFCSSVMH<br>EALHNHYTQKLSLSLSPGK <b>LE</b> DIACGCAAPDIKDLLSRLELEGLVSSLEQGTG                                                                                                                                                                                                                                                               |
| 32 | anti-CD40(APX)-Flag-VL-light-pCR3                             | MNFGFSLIFLVLVLRGQCEVKLVPR <b>QLDYKDDDDK<b>EL</b>DI</b> VMTQTPSSASEPVGTVTI<br>KCQASQSISSRLAWYQKPGQPPKLLIYRASTLASGVPSRFKSGSGTEFTLTISDLEC<br>ADAATYYCQCTGYGISWPIGGGTEVVVK <b>GS</b> EIKRTVAAPSVFIFPPSDEQLKSGTASVV<br>CLLNNFYPREAKVQWVDNALQSGNSQESVTEQDSKDESTYLSSTLTLSKADYEKHKVY<br>ACEVTHQGLSSPVTKSFNRGEC                                                                                                                                                                                                                                                                                                                                                                                                                                                                                                                                                         |
| 33 | anti-CD40(CP-8...)-Flag-VH-IgG1(N297A+E374R/E459G/S469Y)-pCR3 | MNFGFSLIFLVLVLRGQCEVKLVPR <b>QLDYKDDDDK<b>EF</b>QV</b> QLVQSGAEVVKPGASVKS<br>CKASGYTFTGYMHWVRQAPGQGLEWIMGWINPDSGGTNYAQRFQGRVMTMTRDTSISTAY<br>MELNRLRSDDTAVYYCARDQPLGYCTNGVCSYFDYWGGTLVTVSSRSASASTKGPSV<br>FLAPSSKSTSGGTAALGCLVKDYFPEPVTVSWNSGALTSVHTFPAVLQSSGLYSLSSV<br>VTVPSSSLGTQTYICNVNHKPSNTKVDKVEPKSCDKTHTCPPCPAPELGGPSVFLF<br>PKPKDTLMISRTPQVTCVVVDVSHEDPEVKFNWYVDGVEVHNAKTKPREEQYASTYRVV<br>SVLTVLHQDWLNGKEYKCKVSNKALPAPIEKTISKAKGQPRRPQVYTLPPSRDELTKNQ                                                                                                                                                                                                                                                                                                                                                                                                 |



|    |                                                          |                                                                                                                                                                                                                                                                                                                                                                                                                                                                                                                                                                                                                                                                                                                                                                                                            |
|----|----------------------------------------------------------|------------------------------------------------------------------------------------------------------------------------------------------------------------------------------------------------------------------------------------------------------------------------------------------------------------------------------------------------------------------------------------------------------------------------------------------------------------------------------------------------------------------------------------------------------------------------------------------------------------------------------------------------------------------------------------------------------------------------------------------------------------------------------------------------------------|
|    |                                                          | VSLTCLVKGFYPSDIAVEWESNGQPENNYKTTPPVLDSDGSFFFLYSKLTVDKSRWQQGNVFSCSVMHEALHNHYTQKLSLSLSPGK                                                                                                                                                                                                                                                                                                                                                                                                                                                                                                                                                                                                                                                                                                                    |
| 34 | anti-CD40(CP-8...)-Flag-VH-IgG1-pCR3                     | MNFGFSLIFLVLVLKGVQCEVKLVPRQLDYLKDDDDK <b>EF</b> QVQLVQSGAEVKKPGASVKVSCKASGYTFTGYYMHWVRQAPGQGLEWMGWINPDSGGTNYAQKFQGRVTMTRDTSISTAYMELNRLRSDDTAVYYCARDQPLGYCTNGVCSYFDYWGQGLTIVTVSS <b>SR</b> SSASTKGPSVFLPAPSSKSTSGGTAALGCLVKDYFPEPVTVSWNSGALTSGVHTFPAVLQSSGLYSLSSVVTVPSSSLGTQTYICNVNHKPSNTKVDKKEPKSCDKTHTCPPCPAPPELLGGPSVFLFPPKPKDTLMI SRTPEVTCVVDVSHEDPEVKFNWYVDGVEVHNAKTKPREEQYNSTYRVVSVLTVLHQDWLNGKEYKCKVSNKALPAPIEKTISKAKGQPREPQVYTLPPSRDELTKNQVSLTCLVKGFYPSDIAVEWESNGQPENNYKTTPPVLDSDGSFFFLYSKLTVDKSRWQQGNVFSCSVMHEALHNHYTQKLSLSLSPGK                                                                                                                                                                                                                                                                   |
| 35 | anti-CD40(CP-8...)-Flag-VH-IgG2-pCR3                     | MNFGFSLIFLVLVLKGVQCEVKLVPRQLDYLKDDDDK <b>EF</b> QVQLVQSGAEVKKPGASVKVSCKASGYTFTGYYMHWVRQAPGQGLEWMGWINPDSGGTNYAQKFQGRVTMTRDTSISTAYMELNRLRSDDTAVYYCARDQPLGYCTNGVCSYFDYWGQGLTIVTVSS <b>SR</b> SSASTKGPSVFLPAPCSRSTSESTAALGCLVKDYFPEPVTVSWNSGALTSGVHTFPAVLQSSGLYSLSSVVTVPSSNFGTQTYTCNVNDRKPSNTKVDKTKVERKCCVECPAPPVAGPSVFLFPPKPKDTLMI SRTPEVTCVVDVSHEDPEVQFNWYVDGVEVHNAKTKPREEQFNSTFRVSVLTVLHQDWLNGKEYKCKVSNKALPAPIEKTISKAKGQPREPQVYTLPPSRDEMTKNQVSLTCLVKGFYPSDIAVEWESNGQPENNYKTTPPMLDSDGSFFFLYSKLTVDKSRWQQGNVFSCSVMHEALHNHYTQKLSLSLSPGK                                                                                                                                                                                                                                                                         |
| 36 | anti-CD40(CP-8...)-Flag-VH-IgG4-pCR3                     | MNFGFSLIFLVLVLKGVQCEVKLVPRQLDYLKDDDDK <b>EF</b> QVQLVQSGAEVKKPGASVKVSCKASGYTFTGYYMHWVRQAPGQGLEWMGWINPDSGGTNYAQKFQGRVTMTRDTSISTAYMELNRLRSDDTAVYYCARDQPLGYCTNGVCSYFDYWGQGLTIVTVSS <b>SR</b> SSASTKGPSVFLPAPCSRSTSESTAALGCLVKDYFPEPVTVSWNSGALTSGVHTFPAVLQSSGLYSLSSVVTVPSSSLGTQTYTCNVNDRKPSNTKVDKRVESKYGPPCPCPAPEFLGGPSVFLFPPKPKDTLMI SRTPEVTCVVDVSHEDPEVQFNWYVDGVEVHNAKTKPREEQFNSTYRVVSVLTVLHQDWLNGKEYKCKVSNKALPAPIEKTISKAKGQPREPQVYTLPPSQEEMTKNQVSLTCLVKGFYPSDIAVEWESNGQPENNYKTTPPVLDSDGSFFFLYSRLLTVDKSRWQEGNVFSCSVMHEALHNHYTQKLSLSLSPGK                                                                                                                                                                                                                                                                     |
| 37 | anti-CD40(CP-8...)-Flag-VH-N297A-pCR3                    | MNFGFSLIFLVLVLKGVQCEVKLVPRQLDYLKDDDDK <b>EF</b> QVQLVQSGAEVKKPGASVKVSCKASGYTFTGYYMHWVRQAPGQGLEWMGWINPDSGGTNYAQKFQGRVTMTRDTSISTAYMELNRLRSDDTAVYYCARDQPLGYCTNGVCSYFDYWGQGLTIVTVSS <b>SR</b> SSASTKGPSVFLPAPSSKSTSGGTAALGCLVKDYFPEPVTVSWNSGALTSGVHTFPAVLQSSGLYSLSSVVTVPSSSLGTQTYICNVNHKPSNTKVDKKEPKSCDKTHTCPPCPAPPELLGGPSVFLFPPKPKDTLMI SRTPEVTCVVDVSHEDPEVKFNWYVDGVEVHNAKTKPREEQYASTYRVVSVLTVLHQDWLNGKEYKCKVSNKALPAPIEKTISKAKGQPREPQVYTLPPSRDELTKNQVSLTCLVKGFYPSDIAVEWESNGQPENNYKTTPPVLDSDGSFFFLYSKLTVDKSRWQQGNVFSCSVMHEALHNHYTQKLSLSLSPGK                                                                                                                                                                                                                                                                   |
| 38 | anti-CD40(CP-8...)-Flag-VH-N297A-TNC-pCR3                | MNFGFSLIFLVLVLKGVQCEVKLVPRQLDYLKDDDDK <b>EF</b> QVQLVQSGAEVKKPGASVKVSCKASGYTFTGYYMHWVRQAPGQGLEWMGWINPDSGGTNYAQKFQGRVTMTRDTSISTAYMELNRLRSDDTAVYYCARDQPLGYCTNGVCSYFDYWGQGLTIVTVSS <b>SR</b> SSASTKGPSVFLPAPSSKSTSGGTAALGCLVKDYFPEPVTVSWNSGALTSGVHTFPAVLQSSGLYSLSSVVTVPSSSLGTQTYICNVNHKPSNTKVDKKEPKSCDKTHTCPPCPAPPELLGGPSVFLFPPKPKDTLMI SRTPEVTCVVDVSHEDPEVKFNWYVDGVEVHNAKTKPREEQYASTYRVVSVLTVLHQDWLNGKEYKCKVSNKALPAPIEKTISKAKGQPREPQVYTLPPSRDELTKNQVSLTCLVKGFYPSDIAVEWESNGQPENNYKTTPPVLDSDGSFFFLYSKLTVDKSRWQQGNVFSCSVMHEALHNHYTQKLSLSLSPGK <b>LE</b> DIACGCAAAPDIKDLLSRLEELEGLVSSLREQGTG                                                                                                                                                                                                                     |
| 39 | anti-CD40(CP-8...)-Flag-VH-scFv- anti-CD40(CP-8...)-pCR3 | MNFGFSLIFLVLVLKGVQCEVKLVPRQLDYLKDDDDK <b>EF</b> QVQLVQSGAEVKKPGASVKVSCKASGYTFTGYYMHWVRQAPGQGLEWMGWINPDSGGTNYAQKFQGRVTMTRDTSISTAYMELNRLRSDDTAVYYCARDQPLGYCTNGVCSYFDYWGQGLTIVTVSS <b>SR</b> SSASTKGPSVFLPAPSSKSTSGGTAALGCLVKDYFPEPVTVSWNSGALTSGVHTFPAVLQSSGLYSLSSVVTVPSSSLGTQTYICNVNHKPSNTKVDKKEPKSCDKTHTCPPCPAPPELLGGPSVFLFPPKPKDTLMI SRTPEVTCVVDVSHEDPEVKFNWYVDGVEVHNAKTKPREEQYASTYRVVSVLTVLHQDWLNGKEYKCKVSNKALPAPIEKTISKAKGQPREPQVYTLPPSRDELTKNQVSLTCLVKGFYPSDIAVEWESNGQPENNYKTTPPVLDSDGSFFFLYSKLTVDKSRWQQGNVFSCSVMHEALHNHYTQKLSLSLSPGK <b>LE</b> QVQLVQSGAEVKKPGASVKVSFTGYYMHWVRQAPGQGLEWMGWINPDSGGTNYAQKFQGRVTMTRDTSISTAYMELNRLRSDDTAVYYCARDQPLGYCTNGVCSYFDYWGQGLTIVTVSS <b>SR</b> STKPKLEGEFSEAQLDIQMTQSPSSVSASVGDVRTITCRASQGIYSWLAWYQQKPKAPNLLIYASTLQSGVPSRFSGSGSDFTLTISSLQPEDFATYICQANIFPLTFGGGKVEIK |
| 40 | anti-CD40(CP-8...)-Flag-VL-light-pCR3                    | MNFGFSLIFLVLVLKGVQCEVKLVPRQLDYLKDDDDK <b>EL</b> DIQMTQSPSSVSASVGDVRTITCRASQGIYSWLAWYQQKPKAPNLLIYASTLQSGVPSRFSGSGSDFTLTISSLQPEDFATYICQANIFPLTFGGGKVEIK <b>GSE</b> IKRTVAAPSVFIFPPSDEQLKSGTASVVCLLNNFYPREAKVQWKVDNALQSGNSQESVTEQDSKDSSTYLSLSTLTLSKADYEKHKHVVYACEVTHQGLSSPVTKSFNRGEC                                                                                                                                                                                                                                                                                                                                                                                                                                                                                                                          |
| 41 | anti-CD40(V12t)-Fc(DANA)-Flag-pCR3                       | MNFGFSLIFLVLVLKGVQCEVKLVPRQLQVQLQESGGGLVQAGGSLRLSCAASGLVFKRYSMNWYRQPPGQQRGLVASISDSGVSSTNYADSVKGRFTISRDNAKNIGYQLQMSLKPEDTAVYYCNMHTFWGQGTQVTVSS <b>GS</b> DKTHTCPPCPAPPELLGGPSVFLFPPKPKDTLMI SRTPEVTCVVAVSHEDPEVKFNWYVDGVEVHNAKTKPREEQYASTYRVVSVLTVLHQDWLNGKEYKCKVSNKALPAPIEKTISKAKGQPREPQVYTLPPSRDELTKNQVSLTCLVKGFYPSDIAVEWESNGQPENNYKTTPPVLDSDGSFFFLYSKLTVDKSRWQQGNVFSCSVMHEALHNHYTQKLSLSLSPGK <b>EF</b> YKDDDDK <b>LE</b>                                                                                                                                                                                                                                                                                                                                                                                 |
| 42 | anti-CD40(V12t)-VHH-Flag-TNC-pCR3                        | MNFGFSLIFLVLVLKGVQCEVKLVPRQLQVQLQESGGGLVQAGGSLRLSCAASGLVFKRYSMNWYRQPPGQQRGLVASISDSGVSSTNYADSVKGRFTISRDNAKNIGYQLQMSLKPEDTAVYYCNMHTFWGQGTQVTVSS <b>GS</b> DKYKDDDDKDIACGCAAAPDIKDLLSRLEELEGLVSSSFREQGTG                                                                                                                                                                                                                                                                                                                                                                                                                                                                                                                                                                                                      |

|    |                                            |                                                                                                                                                                                                                                                                                                                                                                                                                                                                                                                                                                                                                                                                                                                                                                                                                                                               |
|----|--------------------------------------------|---------------------------------------------------------------------------------------------------------------------------------------------------------------------------------------------------------------------------------------------------------------------------------------------------------------------------------------------------------------------------------------------------------------------------------------------------------------------------------------------------------------------------------------------------------------------------------------------------------------------------------------------------------------------------------------------------------------------------------------------------------------------------------------------------------------------------------------------------------------|
| 43 | anti-CD40(V12t)-VHH-Flag-N297A-pCR3        | <u>MNFGFSLIFLVLVKGVQCEVKLVPRQLDYKDDDDKLE</u> QVQLQESGGGLVQAGGSLRLS CAASGLVFKRYSMNWYRQPPGQQRGLVASISDSGVSTNYADSVKGRFTISRDNAKNIGY LQMNLSLKPEDTAVYYCNMHTFWGQGTQVTVSSGSSASTKGFSPFLAPSSKSTSGGTA ALGCLVKDYFPEPVTVSWNSGALTSVHTFPAVLQSSGLYSLSVTVPSSSLGTQTYI CNVNHKPSNTKVDKVEPKSCDKHTHTCPPCPAPELGGPSVFLFPPKPKDTLMISRTPE VTCVVDVSHEDPEVKFNWYVDGVEVHNAKTKPREEQYASTYRVVSVLTVLHQDWLNGK EYKCKVSNKALPAPIEKTIISKAKGQPREPQVYTLPPSRDELTKNQVSLTCLVKGFYPSD IAVEWESNGQPENNYKTTTPVLDSDGSFFLYSKLTVDKSRWQQGNVFSCSVMHEALHNNH YTQKLSLSLSPGK                                                                                                                                                                                                                                                                                                                                              |
| 44 | anti-CD40(V12t)-VHH-Flag-light-pCR3        | <u>MNFGFSLIFLVLVKGVQCEVKLVPRQLDYKDDDDKLE</u> QVQLQESGGGLVQAGGSLRLS CAASGLVFKRYSMNWYRQPPGQQRGLVASISDSGVSTNYADSVKGRFTISRDNAKNIGY LQMNLSLKPEDTAVYYCNMHTFWGQGTQVTVSSGSEIKRTVAAPSVFI FPPSDEQLKSGT ASVCLLNNFYPREAKVQWVQVDNALQSGNSQESVTEQDSKSTYSLSSTLTLKADYK HKVYACEVTHQGLSSPVTKSFNRGEC                                                                                                                                                                                                                                                                                                                                                                                                                                                                                                                                                                              |
| 45 | anti-CD40(V12t)-VHH(3x)-Fc(DANA)-Flag-pCR3 | <u>MNFGFSLIFLVLVKGVQCEVKLVPRGTQVQLQESGGGLVQAGGSLRLS</u> CAASGLVFKR YSMNWYRQPPGQQRGLVASISDSGVSTNYADSVKGRFTISRDNAKNIGYLQMNLSLKPED TAVYYCNMHTFWGQGTQVTVSSRSGGGGGGGGGGGGGGGGGGGGGGGGGGGGGGGGGGGG GGQVQLQESGGG LVQAGGSLRLS CAASGLVFKRYSMNWYRQPPGQQRGLVASISDSGVSTNYADSVKGRFT ISRDNAKNIGYLQMNLSLKPEDTAVYYCNMHTFWGQGTQVTVSSGGGGGGGGGGGGGGGG GGSGGGGGGGGGGGGGGGGGGGGGGGGGGGGGGGGGGGGGGGGGGGGGGGGGGGGGGGGG GGGGGGGGGGGGGGGGGGGGGGGGGGGGGGGGGGGGGGGGGGGGGGGGGGGGGGGGGGGGGG GGQVQLQESGGGLVQAGGSLRLS CAASGLVFKRYSMNWYRQPPGQQRGLV ASISDSGVSTNYADSVKGRFTISRDNAKNIGYLQMNLSLKPEDTAVYYCNMHTFWGQGTQ VTVSSGSKHTHTCPPCPAPELGGPSVFLFPPKPKDTLMISRTPEVTCVVAVSHEDPEV KFNWYVDGVEVHNAKTKPREEQYASTYRVVSVLTVLHQDWLNGK EYKCKVSNKALPAPI EKTISKAKGQPREPQVYTLPPSRDELTKNQVSLTCLVKGFYPSDI AVEWESNGQPENNY KTTTPVLDSDGSFFLYSKLTVDKSRWQQGNVFSCSVMHEALHNNHYTQKLSLSLSPGK <b>EFD</b> YKDDDDK <b>LE</b> |
| 46 | anti-CD40(V12t)(3x)-Flag-TNC-pCR3          | <u>MNFGFSLIFLVLVKGVQCEVKLVPRGTQVQLQESGGGLVQAGGSLRLS</u> CAASGLVFKR YSMNWYRQPPGQQRGLVASISDSGVSTNYADSVKGRFTISRDNAKNIGYLQMNLSLKPED TAVYYCNMHTFWGQGTQVTVSSRSGGGGGGGGGGGGGGGGGGGGGGGGGGGGGGGGGGGG GGQVQLQESGGG LVQAGGSLRLS CAASGLVFKRYSMNWYRQPPGQQRGLVASISDSGVSTNYADSVKGRFT ISRDNAKNIGYLQMNLSLKPEDTAVYYCNMHTFWGQGTQVTVSSGGGGGGGGGGGGGGGG GGSGGGGGGGGGGGGGGGGGGGGGGGGGGGGGGGGGGGGGGGGGGGGGGGGGGGGGGGGG GGGGGGGGGGGGGGGGGGGGGGGGGGGGGGGGGGGGGGGGGGGGGGGGGGGGGGGGGGGGGG GGQVQLQESGGGLVQAGGSLRLS CAASGLVFKRYSMNWYRQPPGQQRGLV ASISDSGVSTNYADSVKGRFTISRDNAKNIGYLQMNLSLKPEDTAVYYCNMHTFWGQGTQ VTVSSGSDYKDDDDK <b>DIACGCAAAPDIKDLLSRLELEGLVSSLRQGTG</b>                                                                                                                                                                                                                     |
| 47 | CD40(ed)-2xFlag-Gaussia(w/o)-pCR3          | <u>MVRLPQLQCVLWGCLLTAVHPEPPTACREKQYLINSQCCSLCQPGQKLVS</u> DCTEFTETEC LPCGESEFLDTWNRETHCHQHKKYCDPNLGLRVQKGTSETDTICTCEEGWHCTSEACES CVLHRSRCSPGFVGKQIATGVSDTICEPCPVGFSSNVSSAFEKCHPWTSCETKDLVQQA GTNKTDVVCGPQDRIGSDYKDDDDK <b>EF</b> DYKDDDDK <b>LE</b> KPTENNEDFNIVAVASNFATTD LDADRGLPGKLPLEVLKEMEANARKAGCTRGCLICLSHIKCTPKMKKFI PGRCHTYE GDKESAQGGIGEAIVDIP EIPGFKDLEPMEQFIAQVDLCVDCTTGCLKGLANVQCSDLL KKWLPQRCATFASKIQGQVDKIKGAGGD                                                                                                                                                                                                                                                                                                                                                                                                                               |
| 48 | CD40-CRD1,2,3,4-2xFlag-Gaussia(w/o)-pCR3   | <u>MVRLPQLQCVLWGCLLTAVHPEPPTACREKQYLINSQCCSLCQPGQKLVS</u> DCTEFTETEC LPCGESEFLDTWNRETHCHQHKKYCDPNLGLRVQKGTSETDTICTCEEGWHCTSEACES CVLHRSRCSPGFVGKQIATGVSDTICEPCPVGFSSNVSSAFEKCHPWTSCETKDLVQQA GTNKTDVVCGPQDRIGSDYKDDDDK <b>EF</b> DYKDDDDK <b>LE</b> KPTENNEDFNIVAVASNFATTDLDADR GKLPKLPLEVLKEMEANARKAGCTRGCLICLSHIKCTPKMKKFI PGRCHTYEGDKES AQGGIGEAIVDIP EIPGFKDLEPMEQFIAQVDLCVDCTTGCLKGLANVQCSDLLKKWLP QRCATFASKIQGQVDKIKGAGGD                                                                                                                                                                                                                                                                                                                                                                                                                               |
| 49 | CD40-CRD1,2,3-2xFlag-Gaussia(w/o)-pCR3     | <u>MVRLPQLQCVLWGCLLTAVHPEPPTACREKQYLINSQCCSLCQPGQKLVS</u> DCTEFTETEC LPCGESEFLDTWNRETHCHQHKKYCDPNLGLRVQKGTSETDTICTCEEGWHCTSEACES CVLHRSRCSPGFVGKQIATGVSDTICE <b>GS</b> DYKDDDDK <b>EF</b> DYKDDDDK <b>LE</b> KPTENNEDFN I VAVASNFATTDLDADRGLPGKLPLEVLKEMEANARKAGCTRGCLICLSHIKCTPKMK KFI PGRCHTYEGDKESAQGGIGEAIVDIP EIPGFKDLEPMEQFIAQVDLCVDCTTGCLK GLANVQCSDLLKKWLPQRCATFASKIQGQVDKIKGAGGD                                                                                                                                                                                                                                                                                                                                                                                                                                                                     |
| 50 | CD40-CRD1-2-2xFlag-Gaussia(w/o)-pCR3       | <u>MVRLPQLQCVLWGCLLTAVHPEPPTACREKQYLINSQCCSLCQPGQKLVS</u> DCTEFTETEC LPCGESEFLDTWNRETHCHQHKKYCDPNLGLRVQKGTSETDTICT <b>CGS</b> DYKDDDDK <b>EF</b> DYK DDDDK <b>LE</b> KPTENNEDFNIVAVASNFATTDLDADRGLPGKLPLEVLKEMEANARKAGC TRGCLICLSHIKCTPKMKKFI PGRCHTYEGDKESAQGGIGEAIVDIP EIPGFKDLEPME QFIAQVDLCVDCTTGCLKGLANVQCSDLLKKWLPQRCATFASKIQGQVDKIKGAGGD                                                                                                                                                                                                                                                                                                                                                                                                                                                                                                               |
| 51 | CD40-CRD1-2xFlag-Gaussia(w/o)-pCR3         | <u>MVRLPQLQCVLWGCLLTAVHPEPPTACREKQYLINSQCCSLCQPGQKLVS</u> DCTEFTETEC L <b>GS</b> DYKDDDDK <b>EF</b> DYKDDDDK <b>LE</b> KPTENNEDFNIVAVASNFATTDLDADRGLPGKLP LEVLKEMEANARKAGCTRGCLICLSHIKCTPKMKKFI PGRCHTYEGDKESAQGGIGEA IVDIP EIPGFKDLEPMEQFIAQVDLCVDCTTGCLKGLANVQCSDLLKKWLPQRCATFASK IQGQVDKIKGAGGD                                                                                                                                                                                                                                                                                                                                                                                                                                                                                                                                                            |

**Supplemental Table S2. Plasmids used (see supplemental table S1) for production of antibody variants.**

| Protein name               | Plasmids(s) |
|----------------------------|-------------|
| $\alpha$ CD40(G28.5)-IgG1  | 2 + 8       |
| $\alpha$ CD40(ADC)-IgG1    | 19 + 24     |
| $\alpha$ CD40(APX)-IgG1    | 26 + 32     |
| $\alpha$ CD40(ChiLob)-IgG1 | 13 + 16     |

|                                                     |         |
|-----------------------------------------------------|---------|
| $\alpha$ CD40(CP8-...)-IgG1                         | 34 + 40 |
| $\alpha$ CD40(G28.5)-IgG2                           | 3 + 8   |
| $\alpha$ CD40(ADC)-IgG2                             | 20 + 24 |
| $\alpha$ CD40(APX)-IgG2                             | 27 + 32 |
| $\alpha$ CD40(ChiLob)-IgG2                          | 14 + 16 |
| $\alpha$ CD40(CP8-...)-IgG2                         | 35 + 40 |
| $\alpha$ CD40(G28.5)-IgG4                           | 4 + 8   |
| $\alpha$ CD40(ADC)-IgG4                             | 21 + 24 |
| $\alpha$ CD40(APX)-IgG4                             | 28 + 32 |
| $\alpha$ CD40(ChiLob)-IgG4                          | 15 + 16 |
| $\alpha$ CD40(CP8-...)-IgG4                         | 36 + 40 |
| $\alpha$ CD40(G28.5)-IgG1(N297A)                    | 1 + 8   |
| $\alpha$ CD40(ADC)-IgG1(N297A)                      | 17 + 24 |
| $\alpha$ CD40(APX)-IgG1(N297A)                      | 29 + 32 |
| $\alpha$ CD40(ChiLob)-IgG1(N297A)                   | 10 + 16 |
| $\alpha$ CD40(CP8-...)-IgG1(N297A)                  | 37 + 40 |
| $\alpha$ CD40(G28.5)-IgG1(N297A)-HC:scFv(G28.5)     | 7 + 8   |
| $\alpha$ CD40(ADC)-IgG1(N297A)-HC:scFv(ADC)         | 22 + 24 |
| $\alpha$ CD40(APX)-IgG1(N297A)-HC:scFv(APX)         | 30 + 32 |
| $\alpha$ CD40(ChiLob)-IgG1(N297A)-HC:scFv(ChiLob)   | 11 + 16 |
| $\alpha$ CD40(CP8-...)-IgG1(N297A)-HC:scFv(CP8-...) | 39 + 40 |
| $\alpha$ CD40(G28.5)-IgG1(N297A)-HC:TNC             | 5 + 8   |
| $\alpha$ CD40(ADC)-IgG1(N297A)-HC:TNC               | 23 + 24 |
| $\alpha$ CD40(APX)-IgG1(N297A)-HC:TNC               | 31 + 32 |
| $\alpha$ CD40(ChiLob)-IgG1(N297A)-HC:TNC            | 12 + 16 |
| $\alpha$ CD40(CP8-...)-IgG1(N297A)-HC:TNC           | 38 + 40 |
| $\alpha$ CD40(G28.5)-IgG1(N297A)-RGY                | 6 + 8   |
| $\alpha$ CD40(ADC)-IgG1(N297A)-RGY                  | 18 + 24 |
| $\alpha$ CD40(APX)-IgG1(N297A)-RGY                  | 25 + 32 |
| $\alpha$ CD40(ChiLob)-IgG1(N297A)-RGY               | 9 + 16  |
| $\alpha$ CD40(CP8-...)-IgG1(N297A)-RGY              | 33 + 40 |
| V12t-CH/V12t-CL                                     | 43 + 44 |

**Supplemental Table S3. Sources of amino acid sequences.**

|                                          | <b>Amino acids</b>                                                                                                                                              | <b>GenBank (accession)</b> |
|------------------------------------------|-----------------------------------------------------------------------------------------------------------------------------------------------------------------|----------------------------|
| Signalpeptide                            | MNFGFSLIFLVLVLKGVQCEVKLVPR                                                                                                                                      |                            |
| Flag tag                                 | DYKDDDDK                                                                                                                                                        |                            |
| Tenascin-C                               | 110-139                                                                                                                                                         | AAA49086.1                 |
| Restriction sites                        | QL encoded by Mfe1 (CAATTG)<br>EL encoded by EcoR1/Mfe1 (GAATTG)<br>GS encoded by BamH1 (GGATCC)<br>EF encoded by EcoR1 (GAATTC)<br>LE encoded by Xho1 (CTCGAG) |                            |
| <i>Gaussia princeps</i> luciferase (GpL) | 18-185                                                                                                                                                          | AAG54095                   |
| Constant heavy chain of human IgG1       | 145-476                                                                                                                                                         | AAA02914.1                 |

|                                                                                                  |                                                                     |                                          |
|--------------------------------------------------------------------------------------------------|---------------------------------------------------------------------|------------------------------------------|
| Constant heavy chain of human IgG1(A-RGY), with Fc mutation N287A/E374R/E459G/S469Y <sup>1</sup> | 145-476 with Fc mutation N287A/E374R/E459G/S469Y <sup>1</sup>       | AAA02914.1                               |
| Constant heavy chain of human IgG1(N297A), with Fc mutation N287A <sup>1</sup>                   | 145-476 with Fc mutation N287A <sup>1</sup>                         | AAA02914.1                               |
| Constant heavy chain of human IgG2                                                               | 1-325                                                               | AAB59393.1                               |
| Constant heavy chain of human IgG4                                                               | 1-326                                                               | AAB59394.1                               |
| Constant light chain                                                                             | 105-214                                                             | BAA97671.1                               |
| Linker                                                                                           | GGGGSGGGGSGGGGSGGGGSGGGGS                                           |                                          |
| CD40(ed)                                                                                         | 1-192                                                               | AAO43990.1                               |
| CD40(ed)-CRD1-4                                                                                  | 1-187                                                               | AAO43990.1                               |
| CD40(ed)-CRD1-3                                                                                  | 1-144                                                               | AAO43990.1                               |
| CD40(ed)-CRD1-2                                                                                  | 1-103                                                               | AAO43990.1                               |
| CD40(ed)-CDR1                                                                                    | 1-60                                                                | AAO43990.1                               |
| VH and VL of G28.5 domain                                                                        | VL: 148-259 VH: 21-130 (from scFv sequence)                         | AJ853736                                 |
| Selicrelumab                                                                                     | VL: 1-117, VH: 1-126                                                | KEGG drug database entry D11491          |
| APX005M                                                                                          | As indicated VL and VH in aa sequence for light and heavy chain R-8 | WO 2014/070934 A1                        |
| ChiLob7.4                                                                                        | VL: 1-117, VH: 1-122                                                | PDB entries 6FAX_L (V L) and 6FAX_H (VH) |
| Mitazalimab                                                                                      | VL: 1-110, VH: 1-119                                                | Thera-SAbDab <sup>2</sup>                |
| V12t                                                                                             | 1-112                                                               | De Weerd et al., 2021 <sup>3</sup>       |

<sup>1</sup> The numbering of N297 as well as of E374, E459 and S469 in the N297A and E374R/E459G/S469Y mutations refers to that given in the original publications (ref. 36 and 39) and are not identical with the corresponding numbering in the Genbank sequence.

<sup>2</sup> Therapeutic Structural Antibody Database

<sup>3</sup> de Weerd I, Lameris R, Scheffer GL, Vree J, de Boer R, Stam AG, et al. A Bispecific Antibody Antagonizes Prosurvival CD40 Signaling and Promotes V $\gamma$ 9V $\delta$ 2 T cell-Mediated Antitumor Responses in Human B-cell Malignancies. *Cancer Immunol Res.* 2021; 9: 50-61.
